# Supplementary material
Source: publisher site journal article supplement (https://www.dovepress.com/article/448354)
Supplement: Supplementary file 1 [file get_supplementary_file.php]

**Table S1 Variables in** **the 49-item frailty index and their respective scorings**

| Variable | Scoring |
| --- | --- |
| Cognition |  |
| 1. Experience confusion memory problems | Yes=1, No=0 |
| Dependence |  |
| 2. Money manage | Difficulty=1, No Difficulty=0 |
| 3. Stooping, crouching, kneeling | Difficulty=1, No Difficulty=0 |
| 4. Lifting or carrying | Difficulty=1, No Difficulty=0 |
| 5. House chore | Difficulty=1, No Difficulty=0 |
| 6. Preparing meals | Difficulty=1, No Difficulty=0 |
| 7. Standing up from armless chair | Difficulty=1, No Difficulty=0 |
| 8. Getting in and out of bed difficulty | Difficulty=1, No Difficulty=0 |
| 9. Using fork, knife, drinking from cup | Difficulty=1, No Difficulty=0 |
| 10. Dressing yourself | Difficulty=1, No Difficulty=0 |
| 11. Standing for long periods difficulty | Difficulty=1, No Difficulty=0 |
| 12. Grasp/holding small objects | Difficulty=1, No Difficulty=0 |
| 13. Attending social event | Difficulty=1, No Difficulty=0 |
| 14. Push or pull large objects | Difficulty=1, No Difficulty=0 |
| 15. Walking for a quarter mile difficulty | Difficulty=1, No Difficulty=0 |
| 16. Walking up 10 steps difficulty | Difficulty=1, No Difficulty=0 |
| Depressive Symptoms |  |
| 17. Have little interest in doing things | Nearly every day=1, More than half the days=0.66, Several days=0.33, Not at all=0 |
| 18. Feeling down, depressed, or hopeless | Nearly every day=1, More than half the days=0.66, Several days=0.33, Not at all=0 |
| 19. Trouble sleeping or sleeping too much | Nearly every day=1, More than half the days=0.66, Several days=0.33, Not at all=0 |
| 20. Feeling tired or having little energy | Nearly every day=1, More than half the days=0.66, Several days=0.33, Not at all=0 |
| 21. Poor appetite or overeating | Nearly every day=1, More than half the days=0.66, Several days=0.33, Not at all=0 |
| 22. Feeling bad about yourself | Nearly every day=1, More than half the days=0.66, Several days=0.33, Not at all=0 |
| 23. Trouble concentrating on things | Nearly every day=1, More than half the days=0.66, Several days=0.33, Not at all=0 |
| Comorbidities |  |
| 24. Arthritis | Yes=1, Suspect=0.5, No=0 |
| 25. Thyroid problems | Yes=1, Suspect=0.5, No=0 |
| 26. Chronic bronchitis | Yes=1, Suspect=0.5, No=0 |
| 27. Cancer | Yes=1, Suspect=0.5, No=0 |
| 28. Congestive heart failure | Yes=1, Suspect=0.5, No=0 |
| 29. Coronary heart disease | Yes=1, Suspect=0.5, No=0 |
| 30. Angina | Yes=1, Suspect=0.5, No=0 |
| 31. Heart attack | Yes=1, Suspect=0.5, No=0 |
| 32. Stroke | Yes=1, Suspect=0.5, No=0 |
| 33. High blood pressure | Yes=1, Suspect=0.5, No=0 |
| 34. Diabetes | Yes=1, Suspect=0.5, No=0 |
| 35. Weak/failing kidneys | Yes=1, Suspect=0.5, No=0 |
| 36. Urinary leakage | Yes=1, Suspect=0.5, No=0 |
| Hospital Utilization and Access to Care |  |
| 37. Self-rated health | Fair, poor=1, Excellent, very good, good=0 |
| 38. Health now compared with 1 year ago | Worse=1, About the same, Better=0 |
| 39. Overnight hospital patient in past year | Yes=1, No=0 |
| 40. Frequency of health care use during past year | None=0, 1-5=0.5, More than 5=1 |
| 41. Number of prescribed medications | None=0, 1-4=0.5, 5 and more=1 |
| Physical Performance and Anthropometry |  |
| 42. Body mass index | <18.5, ≥30=1  25-<30=0.5  18.5-25=0 |
| 43. Handgrip strength | MALE: FEMALE: |
|  | For BMI≤24, GS≤29 For BMI≤23, GS≤17 |
|  | For BMI≤24.1-28, GS≤30 For BMI≤23.1-26, GS≤17.3 |
|  | For BMI>28, GS≤32 =1 For BMI≤26.1-29, GS≤18 |
|  | For BMI>29, GS≤21=1 |
| Laboratory Values |  |
| 44. Glycohemoglobin (%) | 0-5.7=0, >5.7=1 |
| 45. Red blood cell count (million cells/mL) | M: 4.7-6.1=0, Other=1; F: 4.2-5.4=0, Other=1 |
| 46. Hemoglobin (g/dL) | M:13.5-18=0, Other=1; F: 12-16=0, Other=1 |
| 47. Red cell distribution width (%) | 11.6-14.6=0, Other=1 |
| 48. Lymphocyte percent (%) | 20-40=0, Other=1 |
| 49. Segmented neutrophils percent (%) | 40-80=0, Other=1 |

**Table S2 Each component of CDAI scores between frail and non-frail groups**

| Characteristic | Non-frail | Frail | *P* |
| --- | --- | --- | --- |
| Vitamin A scores | 0.07(0.03) | -0.02(0.02) | 0.02 |
| Vitamin C scores | 0.03(0.02) | -0.08(0.02) | < 0.0001 |
| Vitamin E scores | 0.16(0.02) | -0.01(0.02) | < 0.0001 |
| Selenium scores | 0.10(0.02) | -0.08(0.02) | < 0.0001 |
| Carotenoid scores | 0.10(0.03) | -0.08(0.02) | < 0.0001 |
| Zinc scores | 0.11(0.02) | -0.03(0.02) | < 0.0001 |

**Table S3 Multiple linear regression analysis on the association between CDAI and frailty index**

| CDAI | Weighted beta estimates (95%CIs) | | | *P-*tend |
| --- | --- | --- | --- | --- |
| Tertiles 1  <-1.87 | Tertiles 2  -1.87-0.79 | Tertiles 3  >0.79 |
| Model 1 | 1.00 | -0.02(-0.02, -0.01) *** | -0.03(-0.03, -0.02) *** | <0.0001 |
| Model 2 | 1.00 | -0.01(-0.02, -0.01) *** | -0.02(-0.03, -0.02) *** | <0.0001 |
| Model 3 | 1.00 | -0.01(-0.01, 0.00) * | -0.01(-0.02, 0.00) *** | 0.001 |

**P* < 0.05, *** *P* < 0.001.

Model 1: unadjusted model

Model 2: adjusted for age, sex, race/ethnicity,

Model 3: further adjusted for smoking status, educational level, family income to poverty ratio, physical activity.

**Table S4 Associations of CDAI with albumin**

| CDAI | Weighted beta estimates (95%CIs) | | | *P-*tend |
| --- | --- | --- | --- | --- |
| Tertiles 1  <-1.87 | Tertiles 2  -1.87-0.79 | Tertiles 3  >0.79 |
| Model 1 | 1.00 | 0.04 (0.02, 0.06) *** | 0.05 (0.03, 0.07) *** | <0.0001 |
| Model 2 | 1.00 | 0.03 (0.01, 0.05) ** | 0.04 (0.02, 0.06) *** | 0.001 |
| Model 3 | 1.00 | 0.02 (0.00, 0.04) * | 0.03 (0.01, 0.05) ** | 0.01 |

**P* < 0.05, ** *P* < 0.01, *** *P* < 0.001.

Model 1: unadjusted model

Model 2: adjusted for age, sex, race/ethnicity,

Model 3: further adjusted for smoking status, educational level, family income to poverty ratio, physical activity.

**Table S5 Associations of CDAI with uric acid**

| CDAI | Weighted beta estimates (95%CIs) | | | *P-*tend |
| --- | --- | --- | --- | --- |
| Tertiles 1  <-1.87 | Tertiles 2  -1.87-0.79 | Tertiles 3  >0.79 |
| Model 1 | 1.00 | -0.10 (-0.18, -0.01) * | -0.27 (-0.36, -0.18) *** | <0.0001 |
| Model 2 | 1.00 | -0.12 (-0.20, -0.04) * | -0.28 (-0.36, -0.19) *** | <0.0001 |
| Model 3 | 1.00 | -0.11 (-0.20, -0.03) * | -0.26 (-0.35, -0.18) *** | <0.0001 |

**P* < 0.05, *** *P* < 0.001.

Model 1: unadjusted model

Model 2: adjusted for age, sex, race/ethnicity,

Model 3: further adjusted for smoking status, educational level, family income to poverty ratio, physical activity.

**Table S6 Associations of albumin** **and uric acid with frailty index**

| Dependent variables | Weighted beta estimates (95%CIs) | |
| --- | --- | --- |
| Albumin | Uric acid |
| Frailty index |  |  |
| Model 1 | -0.09 (-0.10, -0.08) *** | 0.01 (0.01,0.01) *** |
| Model 2 | -0.08 (-0.09, -0.07) *** | 0.01 (0.01,0.01) *** |
| Model 3 | -0.07 (-0.08, -0.06) *** | 0.01 (0.01,0.01) *** |

*** *P* < 0.001.

Model 1: unadjusted model

Model 2: adjusted for age, sex, race/ethnicity,

Model 3: further adjusted for smoking status, educational level, family income to poverty ratio, physical activity.

**Table S7 Mediation analyses with separate mediators between CDAI and frailty index**

|  | Indirect effect | Direct effect | Total effect | Prop. |
| --- | --- | --- | --- | --- |
|  | βindirect (95% CI) | βdirect (95% CI) | βtotal (95% CI) | Mediated (%) |
| Albumin | -0.0002(-0.0003, 0.0000) *** | -0.0008(-0.0013, 0.0000) *** | -0.0010(-0.0015, 0.0000) *** | 19.25 |
| Uric acid | -0.0002(-0.0003, 0.0000) *** | -0.0008(-0.0013, 0.0000) ** | -0.0010(-0.0015, 0.0000) *** | 21.26 |

** *P* < 0.01, *** *P* < 0.001.
